# Supplementary material for: Income-related Inequality in Health Outcomes among Older People in China: Measurement and Decomposition Analysis
Source: Research Square preprint supplement (doi:10.21203/rs.3.rs-136452/v1), 2020-12-31
Supplement: Supplementary file 1 [file 2eeeb4c7ea8f90b391f1b743.docx]

**Title Page**

**Income-related inequality in health among older people in China: Measurement and Decomposition analysis**

Yixiao Wang, PhD [candidate]1

**1** Department of Global Health & Social Medicine, King’s College London, London, UK

**Corresponding author:** Yixiao Wang, Department of Global Health and Social Medicine, 3.01 Bush House NE, King's College, London, Strand Campus 30, Aldwych, London WC2R 2LS

Email: [yixiao.1.wang@kcl.ac.uk](mailto:yixiao.1.wang@kcl.ac.uk)

﻿

**Ethics approval and consent to participate:** The CLHLS study was approved by research ethics committees of Duke University and Peking University (IRB00001052–13074). All participants provided written informed consent. No experimental interventions were performed. An exempted Institutional Review Board (IRB) protocol was approved by Duke University (Pro00062871).

**﻿Consent for publication:** Not applicable.

**﻿Availability of data and materials:** The CLHLS datasets and questionaries are publicly available at Peking University Open Research Data Repository (https://opendata.pku.edu.cn/dataset.xhtml?persistentId=doi:10.18170/DVN/WBO7LK). Researchers may obtain the datasets after sending a data user agreement to the CLHLS team.

**﻿Competing interests:** The authors declare they have no competing interests or financial relationships relevant to this article to disclose.

**Funding:** It is funded by PhD Research Scholarship by King’s-China Scholarship Council (K-CSC) Programme.

**Authors' contributions:** ﻿Yixiao Wang initiated and designed the study, analyzed the data, wrote and revised the article. ﻿

**Acknowledgment**: The author thanks Peking University for providing the data.

**Declarations of interest**: Not applicable.

**Author's information:** Yixiao Wang, Department of Global Health and Social Medicine, 3.01 Bush House NE, King's College, London, Strand Campus 30, Aldwych, London WC2R 2LS

Supplementary Table 1. Concentration index for SRH and ADL ability

|  | SRH | Having ADL limitations |
| --- | --- | --- |
| Unstandardized CI | 0.014 | -0.066 |
| Standardized CI | 0.013 | -0.045 |

Supplementary Table 2. Determinants of SRH and ADL ability

|  | SRH | ADL ability |
| --- | --- | --- |
| Demographic variables | |  |
| Age | -0.010 (0.002) *** | 0.022 (0.001) *** |
| Gender | 0.117 (0.030) *** | -0.016 (0.018) |
| Socioeconomic variables | | |
| Income | 0.064 (0.009) *** | -0.022 (0.002) *** |
| Education (Ref: Illiteracy) |  |  |
| Elementary school | -0.048 (0.038) | -0.064 (0.019) *** |
| Middle school and above | -0.221 (0.065) *** | -0.094 (0.028) *** |
| Having medical insurance | -0.047 (0.048) | 0.001 (0.027) |
| Marital status | 0.066 (0.033) ** | 0.002 (0.018) |
| Residence (Ref: City) |  |  |
| Town | 0.089 (0.042) ** | -0.092 (0.029) *** |
| Rural | 0.131 (0.043) *** | -0.101 (0.030) *** |
| Regions (Ref: North) |  |  |
| Northeast | -0.018 (0.100) | 0.064 (0.059) |
| East | -0.177 (0.067) *** | -0.029 (0.043) |
| South Central | -0.278 (0.067) *** | -0.060 (0.042) |
| Northwest | --0.348 (0.158) ** | 0.057 (0.079) |
| Southwest | -0.272 (0.074) *** | -0.060 (0.045) |
| Constant | 3.643 (0.203) *** | -1.102 (0.143) *** |
| N | 10,078 | |

Supplementary Table 3. Decomposition results of SRH and ADL ability

|  | CI | Self-rated health | | ADL ability | |
| --- | --- | --- | --- | --- | --- |
|  | Contribution | Relative contribution | Contribution | Relative contribution |
| Age | -0.002 | 0.000 | 0.04% | 0.000 | 0.44% |
| Gender | 0.005 | 0.001 | 1.30% | 0.000 | 0.84% |
| Income | 0.087 | 0.006 | 11.93% | -0.002 | 19.80% |
| Education |  |  |  |  |  |
| Elementary school | 0.163 | -0.008 | -16.96% | -0.011 | 106.67% |
| Middle school and above | 0.385 | -0.085 | -182.73% | -0.036 | 367.63% |
| Having medical insurance | -0.004 | 0.000 | 0.41% | 0.000 | 0.06% |
| Marital status | 0.006 | 0.000 | 0.90% | 0.000 | -0.13% |
| Residence |  |  |  |  |  |
| Town | -0.106 | -0.009 | -20.28% | 0.010 | -98.28% |
| Rural | -0.172 | -0.023 | -48.56% | 0.017 | -176.10% |
| Regions |  |  |  |  |  |
| Northeast | 0.136 | -0.002 | -5.26% | 0.009 | -88.47% |
| East | 0.020 | -0.003 | -7.50% | -0.001 | 5.79% |
| South Central | -0.091 | 0.025 | 54.41% | 0.005 | -55.43% |
| Northwest | -0.178 | 0.062 | 133.03% | -0.010 | 103.70% |
| Southwest | -0.053 | 0.014 | 31.10% | 0.003 | -32.19% |
